# Supplementary material
Source: HighWire-hosted journal article supplement (https://bibliotheek.ehb.be/content/suppl/2023/10/11/bmjnph-2022-000612)
Supplement: bmjnph-2022-000612supp001_data_supplement.pdf [file bmjnph-2022-000612supp001_data_supplement.pdf]

## **Supplementary Materials**

| <b>Supplementary Table 1. Number of women included in analysis by lifestyle behavioral factor.</b> |               |        |     |                                                     |        |     |                                                     |        |     |
|----------------------------------------------------------------------------------------------------|---------------|--------|-----|-----------------------------------------------------|--------|-----|-----------------------------------------------------|--------|-----|
| Lifestyle behaviors                                                                                | Main analysis |        |     | Restricted to women with < 5 years since last birth |        |     | Restricted to women living with children < 18 years |        |     |
|                                                                                                    | Total         | No GDM | GDM | Total                                               | No GDM | GDM | Total                                               | No GDM | GDM |
| <b>Diet</b>                                                                                        |               |        |     |                                                     |        |     |                                                     |        |     |
| Fruit and berries                                                                                  | 7511          | 7386   | 125 | 2500                                                | 2417   | 83  | 6444                                                | 6333   | 111 |
| Vegetables                                                                                         | 7509          | 7384   | 125 | 2499                                                | 2417   | 82  | 6447                                                | 6335   | 112 |
| Red meat                                                                                           | 7551          | 7425   | 126 | 2513                                                | 2430   | 83  | 6479                                                | 6367   | 112 |
| Fatty fish                                                                                         | 7518          | 7392   | 126 | 2504                                                | 2421   | 83  | 6453                                                | 6341   | 112 |
| Lean fish                                                                                          | 7512          | 7386   | 126 | 2500                                                | 2417   | 83  | 6447                                                | 6335   | 112 |
| Total fish                                                                                         | 7522          | 7396   | 126 | 2504                                                | 2421   | 83  | 6455                                                | 6343   | 112 |
| Beverages with added sugar                                                                         | 7477          | 7352   | 125 | 2486                                                | 2404   | 82  | 6425                                                | 6313   | 112 |
| Alcohol                                                                                            | 6909          | 6789   | 120 | 2243                                                | 2166   | 77  | 5909                                                | 5803   | 106 |
| Physical activity                                                                                  | 6278          | 6185   | 93  | 1977                                                | 1918   | 59  | 5376                                                | 5292   | 84  |
| Current smoker                                                                                     | 7531          | 7405   | 126 | 2503                                                | 2420   | 83  | 6464                                                | 6352   | 112 |
| <b>Sleep</b>                                                                                       |               |        |     |                                                     |        |     |                                                     |        |     |
| Sleep duration                                                                                     | 7405          | 7279   | 126 | 2453                                                | 2370   | 83  | 6371                                                | 6259   | 112 |
| Daytime dysfunction                                                                                | 7434          | 7311   | 123 | 2470                                                | 2389   | 81  | 6394                                                | 6283   | 111 |
| <b>Lifestyle perception</b>                                                                        |               |        |     |                                                     |        |     |                                                     |        |     |
| Healthy lifestyle importance                                                                       | 7502          | 7376   | 126 | 2496                                                | 2413   | 83  | 6440                                                | 6328   | 112 |
| Lifestyle satisfaction                                                                             | 7495          | 7370   | 125 | 2494                                                | 2411   | 83  | 6433                                                | 6322   | 111 |
| Abbreviations: GDM=gestational diabetes mellitus                                                   |               |        |     |                                                     |        |     |                                                     |        |     |

| <b>Supplementary Table 2.</b> Outcome variable categorization and basis of definition     |                                                                                                                              |                                                                                                                                                  |                                                          |                                                                                                                                                             |
|-------------------------------------------------------------------------------------------|------------------------------------------------------------------------------------------------------------------------------|--------------------------------------------------------------------------------------------------------------------------------------------------|----------------------------------------------------------|-------------------------------------------------------------------------------------------------------------------------------------------------------------|
| <b>VARIABLE NAME</b>                                                                      | <b>Questions HUNT4</b>                                                                                                       | <b>Questions MHH</b>                                                                                                                             | <b>Dichotomization</b>                                   | <b>BASIS OF CATEGORIZATION</b>                                                                                                                              |
| <b>DIET</b> (Based on Norwegian food-based dietary guidelines (NFBDG))                    |                                                                                                                              |                                                                                                                                                  |                                                          |                                                                                                                                                             |
| <b>Fruit and berries</b>                                                                  | How often do you eat the following food groups per week: Fruit and berries?*<br>< once, 1-3 times, 4-6 times, $\geq 7$ times | How many times per week and how much did you eat of the following? <i>Large fruit, medium fruit, small fruit and berries.</i>                    | a) $\geq 7$ times per week<br>b) < 7 times per week      | <i>Recommended in NFBDG:</i><br>250g fruit and/or berries every day (1).                                                                                    |
| <b>Vegetables</b>                                                                         | How often do you eat the following food groups per week: Vegetables?*<br>< once, 1-3 times, 4-6 times, $\geq 7$ times        | How many times per week and how much did you eat of the following? <i>Garlic, onion, tomato, tomato sauce, mixed salad and other vegetables.</i> | a) $\geq 7$ times per week<br>b) < 7 times per week      | <i>Recommended in NFBDG:</i><br>250g vegetables every day (1).                                                                                              |
| <b>Red meat</b><br>(Beef, pork, lamb, game)                                               | How often do you eat the following food groups per week: Red meat?*<br>< once, 1-3 times, 4-6 times, $\geq 7$ times          | How many times per week and how much did you eat of the following? <i>Unprocessed red meat and processed red meat.</i>                           | a) $\leq 3$ times per week<br>b) $\geq 4$ times per week | <i>Recommended in NFBDG:</i><br>500g per week à 2-3 dinners and some on bread (1).                                                                          |
| <b>Lean fish</b><br>(E.g. cod, pollock)                                                   | How often do you eat the following food groups per week: Lean fish?*<br>< once, 1-3 times, 4-6 times, $\geq 7$ times         | How many times per week and how much did you eat of the following? <i>Lean fish</i>                                                              | a) $\geq 1$ time per week<br>b) < 1 time per week        | <i>Recommended in NFBDG:</i><br>Fish for dinner 2-3 times per week.<br>Approximately 300-450 grams fish per week.<br>At least 200g should be fatty fish(1). |
| <b>Fatty fish</b><br>(E.g. salmon, trout, herring, mackerel, haddock on bread/for dinner) | How often do you eat the following food groups per week: Fatty fish?*<br>< once, 1-3 times, 4-6 times, $\geq 7$ times        | How many times per week and how much did you eat of the following?<br><i>Fatty fish</i>                                                          | a) $\geq 1$ time per week<br>b) < 1 time per week        |                                                                                                                                                             |
| <b>Total fish</b>                                                                         |                                                                                                                              |                                                                                                                                                  | a) $\geq 1$ time per week<br>b) < 1 time per week        | Score a) on “lean fish” and/or “fatty fish” was set as “healthy intake”                                                                                     |

|                                                                                                                                                                                                                                                                    |                                                                                                                                    |                                                                                                                                                                                      |                                                                          |                                                                                                                                                                                                                                                                                                                                                                                                                                                                                                                                                                                                                |
|--------------------------------------------------------------------------------------------------------------------------------------------------------------------------------------------------------------------------------------------------------------------|------------------------------------------------------------------------------------------------------------------------------------|--------------------------------------------------------------------------------------------------------------------------------------------------------------------------------------|--------------------------------------------------------------------------|----------------------------------------------------------------------------------------------------------------------------------------------------------------------------------------------------------------------------------------------------------------------------------------------------------------------------------------------------------------------------------------------------------------------------------------------------------------------------------------------------------------------------------------------------------------------------------------------------------------|
| <b>Alcohol</b>                                                                                                                                                                                                                                                     | Total alcohol units per week                                                                                                       | How many times per week and how much did you drink of the following? <i>Beer and wine with alcohol, and liquor.</i>                                                                  | a) $\leq 7$ units per week<br>b) $> 7$ units per week                    | <i>Recommended in NFBDG and Nordic guidelines:</i><br>Intake should not exceed 10g (1 unit per day) for women (1). 1 unit is defined as 12 g alcohol corresponding to the alcohol content in one bottle of beer (330mL), one glass of wine (120mL), or one drink with liquor (40mL). The definition of a unit varies in different countries from approximately 8-12g.                                                                                                                                                                                                                                          |
| <b>Beverages with added sugar</b><br>(Soda/squashes, juice, etc.)                                                                                                                                                                                                  | How many glasses/cups of the following drinks do you usually drink/eat? <i>Soda/squashes/juice with sugar</i>                      | How many times per week and how much did you drink of the following? <i>Soda/squashes/juice and other beverages with added sugar.</i>                                                | a) Never/rare<br>b) $\geq 1$ glass per week                              | <i>Recommended in NFBDG:</i><br>Limit the intake of beverages and foods with added sugar to less than 10% of total energy intake (1).                                                                                                                                                                                                                                                                                                                                                                                                                                                                          |
| <b>Smoking</b>                                                                                                                                                                                                                                                     | What is your smoking status?                                                                                                       |                                                                                                                                                                                      | a) Never or former daily/-occasionally<br>b) Current daily/-occasionally |                                                                                                                                                                                                                                                                                                                                                                                                                                                                                                                                                                                                                |
| <b>Physical activity</b><br><br><b>Moderate intensity</b><br>(Fast gait, hard housework or other activity which makes one short of breath)<br><br><b>High intensity</b><br>(Jogging, cross-country skiing or other activities that makes one very short of breath) | How hard do you exercise? (average)<br><br>How many times per week do you exercise?<br><br>For how long do you exercise each time? | How many times per week were you physical active at moderate intensity and for how long?<br><br>How many times per week were you physical active at high intensity and for how long? | a) $< 500$ MET per week<br>b) $\geq 500$ MET per week                    | The metabolic equivalent of task (MET) is the objective measure of the ratio of the rate at which a person expends energy, relative to the mass of that person.<br>Moderate intensity gives at least 3 MET per minute and high intensity at least 6 MET per minute.<br>Weekly MET was calculated by combining weekly MET of moderate and high intensity exercise:<br>Mod. intensity: Times per week * minutes per time * 3<br>High intensity: Times per week * minutes per time * 6<br><i>Recommended is approximately <math>&gt; 500</math> MET per week, but <math>&gt; 900</math> MET is favorable (2).</i> |

|                                                                                                                                                                                                                                                                                                                                                                                                                                                                                                                                                                                                                                                                                                                                                                                                                                                                                                                         |                                                                                                        |                                                                                                                       |                                                                                                                 |                                                                                                                                                          |
|-------------------------------------------------------------------------------------------------------------------------------------------------------------------------------------------------------------------------------------------------------------------------------------------------------------------------------------------------------------------------------------------------------------------------------------------------------------------------------------------------------------------------------------------------------------------------------------------------------------------------------------------------------------------------------------------------------------------------------------------------------------------------------------------------------------------------------------------------------------------------------------------------------------------------|--------------------------------------------------------------------------------------------------------|-----------------------------------------------------------------------------------------------------------------------|-----------------------------------------------------------------------------------------------------------------|----------------------------------------------------------------------------------------------------------------------------------------------------------|
| <b>Sleep duration</b>                                                                                                                                                                                                                                                                                                                                                                                                                                                                                                                                                                                                                                                                                                                                                                                                                                                                                                   | How many hours of sleep do you get per night on a normal everyday:                                     | How many hours of sleep do you get per night on a normal everyday/per 24 hours:                                       | a) > 6 hours per night<br>b) ≤ 6 hours per night                                                                | <i>Recommended in guidelines and similar Norwegian research:</i><br>> 6 hours of sleep per night is considered healthy, but 8-9 hours is preferable (3). |
| <b>Daytime dysfunction due to insomnia</b>                                                                                                                                                                                                                                                                                                                                                                                                                                                                                                                                                                                                                                                                                                                                                                                                                                                                              | How often do you function poorly during day (socially/at work) due to insomnia?                        | How do you perceive your sleep quality lately:                                                                        | HUNT:<br>a) Never/rarely/sometimes<br>b) ≥ 3 times per week<br>MHH:<br>a) (Very) good/median<br>b) Bad/very bad |                                                                                                                                                          |
| <b>Lifestyle importance</b>                                                                                                                                                                                                                                                                                                                                                                                                                                                                                                                                                                                                                                                                                                                                                                                                                                                                                             | How important is it for you to live healthy?                                                           | How important is it for you to live healthy?<br>(scale 1-5)                                                           | HUNT:<br>a) (Very) important<br>b) Less/not important<br>MHH:<br>a) ≥4<br>b) <4                                 |                                                                                                                                                          |
| <b>Lifestyle satisfaction</b>                                                                                                                                                                                                                                                                                                                                                                                                                                                                                                                                                                                                                                                                                                                                                                                                                                                                                           | How satisfied are you with your own lifestyle (diet, physical activity, smoking- and drinking habits)? | How satisfied are you with your own lifestyle (diet, physical activity, smoking- and drinking habits)?<br>(scale 1-5) | HUNT:<br>a) Satisfied /very satisfied<br>b) Less/not satisfied<br>MHH:<br>a) ≤2<br>b) >2                        |                                                                                                                                                          |
| <p>Alternative a) is the measure set as “healthy” in our study. Cut off as close as possible to recommendations mentioned.<br/>Alternative b) is the measure set as “unhealthy” in our study. Cutoff as close as possible to recommendations mentioned.<br/>* Amount unknown</p> <ol style="list-style-type: none"> <li>1. Kostrådene. Helsedirektoratet. [citation 19. april 2022]. Available at: <a href="https://www.helsedirektoratet.no/faglige-rad/kostradene-og-naeringsstoffer/kostrad-for-befolkningen">https://www.helsedirektoratet.no/faglige-rad/kostradene-og-naeringsstoffer/kostrad-for-befolkningen</a></li> <li>2. Kaminsky LA, Montoye AHK. Physical Activity and Health: What Is the Best Dose? J Am Heart Assoc. 3(5):e001430.</li> <li>3. Johnsen MT, Wynn R, Bratlid T. Optimal Sleep Duration in the Subarctic with Respect to Obesity Risk. PLoS ONE. 15. februar 2013;8(2):e56756.</li> </ol> |                                                                                                        |                                                                                                                       |                                                                                                                 |                                                                                                                                                          |

| <b>Supplementary Table 3. Sensitivity analysis restricted to women with &lt; 5 years since last birth. Unhealthy lifestyle behaviors and lifestyle perceptions in HUNT4 participants with a history of GDM relative to women without GDM.</b> |                          |                       |         |      |                  |      |                  |
|-----------------------------------------------------------------------------------------------------------------------------------------------------------------------------------------------------------------------------------------------|--------------------------|-----------------------|---------|------|------------------|------|------------------|
|                                                                                                                                                                                                                                               | No history of GDM, n (%) | History of GDM, n (%) | p-value | OR   | Model 1 (95% CI) | OR   | Model 2 (95% CI) |
| <b>Lifestyle behaviors</b>                                                                                                                                                                                                                    |                          |                       |         |      |                  |      |                  |
| <b>Diet</b>                                                                                                                                                                                                                                   |                          |                       |         |      |                  |      |                  |
| Fruit and berries (<7 times/week)                                                                                                                                                                                                             | 1845 (76.3)              | 67 (80.7)             | 0.35    | 1.30 | (0.75-2.26)      | 1.27 | (0.72-2.34)      |
| Vegetables (<7 times/week)                                                                                                                                                                                                                    | 1729 (71.5)              | 62 (75.6)             | 0.42    | 1.23 | (0.74-2.06)      | 1.22 | (0.72-2.06)      |
| Red meat ( $\geq$ 4 times/week)                                                                                                                                                                                                               | 334 (13.7)               | 11 (13.3)             | 0.90    | 0.96 | (0.50-1.83)      | 0.94 | (0.49-1.82)      |
| Fatty fish (<1 times/week)                                                                                                                                                                                                                    | 882 (36.4)               | 29 (34.9)             | 0.78    | 0.94 | (0.59-1.48)      | 0.90 | (0.57-1.43)      |
| Lean fish (<1 times/week)                                                                                                                                                                                                                     | 1058 (43.8)              | 37 (44.6)             | 0.88    | 1.03 | (0.67-1.60)      | 1.06 | (0.68-1.66)      |
| Total fish (<1 times/week)                                                                                                                                                                                                                    | 591 (24.4)               | 21 (25.3)             | 0.85    | 1.05 | (0.63-1.74)      | 1.04 | (0.63-1.74)      |
| Beverages with added sugar ( $\geq$ 1 glass/week)                                                                                                                                                                                             | 1258 (52.3)              | 38 (46.3)             | 0.29    | 0.79 | (0.51-1.22)      | 0.80 | (0.51-1.26)      |
| Alcohol ( $>$ 7 units/week)                                                                                                                                                                                                                   | 16 (0.7)                 | 1 (1.3)               | 0.58    | 1.77 | (0.23-13.51)     | 1.78 | (0.22-14.22)     |
| Physical activity (<500 MET/week)                                                                                                                                                                                                             | 934 (48.7)               | 34 (57.6)             | 0.18    | 1.43 | (0.85-2.42)      | 1.36 | (0.80-2.31)      |
| Current smoker                                                                                                                                                                                                                                | 161 (6.7)                | 9 (10.8)              | 0.14    | 1.71 | (0.84-3.47)      | 1.51 | (0.72-3.17)      |
| <b>Sleep</b>                                                                                                                                                                                                                                  |                          |                       |         |      |                  |      |                  |
| Sleep duration (<6 hours/night)                                                                                                                                                                                                               | 220 (9.2)                | 6 (7.2)               | 0.53    | 0.76 | (0.33-1.77)      | 0.66 | (0.28-1.54)      |
| Daytime dysfunction                                                                                                                                                                                                                           | 103 (4.3)                | 3 (3.7)               | 0.79    | 0.85 | (0.26-2.75)      | 0.85 | (0.26-2.76)      |
| <b>Lifestyle perception</b>                                                                                                                                                                                                                   |                          |                       |         |      |                  |      |                  |
| Healthy lifestyle not important                                                                                                                                                                                                               | 167 (6.9)                | 11 (13.3)             | 0.03    | 2.05 | (1.07-3.95)      | 1.98 | (1.00-3.91)      |
| Not satisfied with own lifestyle                                                                                                                                                                                                              | 849 (35.2)               | 40 (48.2)             | 0.02    | 1.71 | (1.10-2.65)      | 1.70 | (1.09-2.66)      |
| Data presented as odds ratio (OR) with 95% confidence interval (95% CI).                                                                                                                                                                      |                          |                       |         |      |                  |      |                  |
| Abbreviations: GDM=gestational diabetes mellitus; MET=Metabolic Equivalent of Task.                                                                                                                                                           |                          |                       |         |      |                  |      |                  |
| Model 1 is unadjusted, model 2 is adjusted for age, birth country, cohabitant status, education, parity and time since last birth.                                                                                                            |                          |                       |         |      |                  |      |                  |

| <b>Supplementary Table 4. Sensitivity analysis restricted to women living with children &lt; 18 years. Unhealthy lifestyle behaviors and lifestyle perceptions in HUNT4 participants with a history of GDM relative to women without GDM.</b> |                          |                       |         |      |                  |      |                  |
|-----------------------------------------------------------------------------------------------------------------------------------------------------------------------------------------------------------------------------------------------|--------------------------|-----------------------|---------|------|------------------|------|------------------|
|                                                                                                                                                                                                                                               | No history of GDM, n (%) | History of GDM, n (%) | p-value | OR   | Model 1 (95% CI) | OR   | Model 2 (95% CI) |
| <b>Lifestyle behaviors</b>                                                                                                                                                                                                                    |                          |                       |         |      |                  |      |                  |
| <b>Diet</b>                                                                                                                                                                                                                                   |                          |                       |         |      |                  |      |                  |
| Fruit and berries (<7 times/week)                                                                                                                                                                                                             | 4882 (77.1)              | 90 (81.1)             | 0.32    | 1.27 | (0.79-2.06)      | 1.28 | (0.78-2.08)      |
| Vegetables (<7 times/week)                                                                                                                                                                                                                    | 4584 (72.4)              | 88 (78.6)             | 0.15    | 1.40 | (0.89-2.21)      | 1.42 | (0.89-2.26)      |
| Red meat ( $\geq 4$ times/week)                                                                                                                                                                                                               | 790 (12.4)               | 13 (11.6)             | 0.80    | 0.93 | (0.52-1.66)      | 0.84 | (0.47-1.52)      |
| Fatty fish (<1 times/week)                                                                                                                                                                                                                    | 2325 (36.7)              | 44 (39.3)             | 0.57    | 1.12 | (0.76-1.64)      | 1.12 | (0.76-1.66)      |
| Lean fish (<1 times/week)                                                                                                                                                                                                                     | 3126 (49.3)              | 51 (45.5)             | 0.42    | 0.86 | (0.59-1.25)      | 0.98 | (0.67-1.43)      |
| Total fish (<1 times/week)                                                                                                                                                                                                                    | 1663 (26.2)              | 33 (29.5)             | 0.44    | 1.18 | (0.78-1.77)      | 1.25 | (0.83-1.90)      |
| Beverages with added sugar ( $\geq 1$ glass/week)                                                                                                                                                                                             | 3059 (48.5)              | 47 (42.0)             | 0.17    | 0.77 | (0.53-1.12)      | 0.69 | (0.47-1.01)      |
| Alcohol ( $> 7$ units/week)                                                                                                                                                                                                                   | 76 (1.3)                 | 2 (1.9)               | 0.61    | 1.45 | (0.35-5.98)      | 1.87 | (0.44-7.88)      |
| Physical activity (<500 MET/week)                                                                                                                                                                                                             | 2202 (41.6)              | 45 (53.6)             | 0.03    | 1.62 | (1.05-2.49)      | 1.30 | (0.84-2.03)      |
| Current smoker                                                                                                                                                                                                                                | 541 (8.5)                | 14 (12.5)             | 0.14    | 1.53 | (0.87-2.70)      | 1.65 | (0.90-2.99)      |
| <b>Sleep</b>                                                                                                                                                                                                                                  |                          |                       |         |      |                  |      |                  |
| Sleep duration (<6 hours/night)                                                                                                                                                                                                               | 500 (8.0)                | 4 (3.6)               | 0.09    | 0.43 | (0.16-1.16)      | 0.35 | (0.13-0.97)      |
| Daytime dysfunction                                                                                                                                                                                                                           | 270 (4.3)                | 5 (4.5)               | 0.92    | 1.05 | (0.42-2.60)      | 1.05 | (0.42-2.62)      |
| <b>Lifestyle perception</b>                                                                                                                                                                                                                   |                          |                       |         |      |                  |      |                  |
| Healthy lifestyle not important                                                                                                                                                                                                               | 378 (6.0)                | 14 (12.5)             | <0.01   | 2.25 | (1.27-3.97)      | 1.95 | (1.08-3.51)      |
| Not satisfied with own lifestyle                                                                                                                                                                                                              | 1840 (29.1)              | 48 (43.2)             | <0.01   | 1.86 | (1.27-2.71)      | 1.57 | (1.07-2.32)      |
| Data presented as odds ratio (OR) with 95% confidence interval (95% CI).                                                                                                                                                                      |                          |                       |         |      |                  |      |                  |
| Abbreviations: GDM=gestational diabetes mellitus; MET=Metabolic Equivalent of Task.                                                                                                                                                           |                          |                       |         |      |                  |      |                  |
| Model 1 is unadjusted, model 2 is adjusted for age, birth country, cohabitant status, education, parity and time since last birth.                                                                                                            |                          |                       |         |      |                  |      |                  |

**Supplementary Table 5. Sensitivity analysis including women with diagnosis of hypertension, CVD or diabetes and women with self-reported use of cholesterol lowering medication. Unhealthy lifestyle behaviors and lifestyle perception in HUNT4 participants with prior GDM relative to women without GDM.**

|                                                                                                                                    | No History of GDM, n (%) | History of GDM, n (%) | p-value | Model 1 |             | Model 2 |             |
|------------------------------------------------------------------------------------------------------------------------------------|--------------------------|-----------------------|---------|---------|-------------|---------|-------------|
|                                                                                                                                    |                          |                       |         | OR      | (95% CI)    | OR      | (95% CI)    |
| <b>Lifestyle behaviors</b>                                                                                                         |                          |                       |         |         |             |         |             |
| <b>Diet</b>                                                                                                                        |                          |                       |         |         |             |         |             |
| Fruit and berries (<7 times/week)                                                                                                  | 6148 (77.0)              | 144 (80.9)            | 0.22    | 1.27    | (0.87-1.85) | 1.30    | (0.89-1.91) |
| Vegetables (<7 times/week)                                                                                                         | 5773 (72.3)              | 142 (79.8)            | 0.03    | 1.51    | (1.04-2.18) | 1.56    | (1.07-2.28) |
| Red meat (≥4 times/week)                                                                                                           | 1002 (12.5)              | 24 (13.4)             | 0.71    | 1.09    | (0.70-1.68) | 1.00    | (0.64-1.55) |
| Fatty fish (<1 times/week)                                                                                                         | 2930 (36.7)              | 73 (40.8)             | 0.26    | 1.19    | (0.88-1.61) | 1.22    | (0.90-1.65) |
| Lean fish (<1 times/week)                                                                                                          | 3898 (48.8)              | 90 (50.3)             | 0.7     | 1.06    | (0.79-1.43) | 1.21    | (0.89-1.63) |
| Total fish (<1 times/week)                                                                                                         | 2101 (26.3)              | 60 (33.5)             | 0.03    | 1.41    | (1.03-1.94) | 1.54    | (1.12-2.12) |
| Beverages with added sugar (≥ 1 glass/week)                                                                                        | 3738 (47.0)              | 71 (39.9)             | 0.06    | 0.75    | (0.55-1.01) | 0.69    | (0.50-0.94) |
| Alcohol (> 7 units/week)                                                                                                           | 100 (1.4)                | 2 (1.2)               | 0.85    | 0.88    | (0.21-3.58) | 1.13    | (0.27-4.67) |
| Physical activity (<500 MET/week)                                                                                                  | 2759 (41.4)              | 70 (54.7)             | 0.003   | 1.71    | (1.20-2.42) | 1.41    | (0.98-2.01) |
| Current smoker                                                                                                                     | 741 (9.3)                | 21 (11.7)             | 0.26    | 1.30    | (0.82-2.07) | 1.38    | (0.85-2.23) |
| <b>Sleep</b>                                                                                                                       |                          |                       |         |         |             |         |             |
| Sleep duration (<6 hours/night)                                                                                                    | 648 (8.2)                | 14 (7.9)              | 0.86    | 0.95    | (0.55-1.65) | 0.82    | (0.47-1.43) |
| Daytime dysfunction                                                                                                                | 349 (4.4)                | 12 (6.9)              | 0.12    | 1.59    | (0.88-2.89) | 1.59    | (0.87-2.92) |
| <b>Lifestyle perception</b>                                                                                                        |                          |                       |         |         |             |         |             |
| Healthy lifestyle not important                                                                                                    | 483 (6.1)                | 18 (10.1)             | 0.03    | 1.73    | (1.06-2.85) | 1.58    | (0.95-2.62) |
| Not satisfied with own lifestyle                                                                                                   | 2326 (29.2)              | 83 (46.9)             | <0.001  | 2.14    | (1.59-2.89) | 1.88    | (1.39-2.55) |
| Data presented as odds ratio (OR) with 95% confidence interval (95% CI).                                                           |                          |                       |         |         |             |         |             |
| Abbreviations: GDM=gestational diabetes mellitus; MET=Metabolic Equivalent of Task.                                                |                          |                       |         |         |             |         |             |
| Model 1 is unadjusted, model 2 is adjusted for age, birth country, cohabitant status, education, parity and time since last birth. |                          |                       |         |         |             |         |             |
